# Supplementary material for: Non-enzymatic determination of purine nucleotides using a carbon dot modified glassy carbon electrode
Source: Royal Society of Chemistry journal article supplement (doi:10.1039/c9ay00718k), 2019-01-01
Supplement: c9ay00718k1.pdf [file c9ay00718k1.pdf]

## Supplementary information

### Non-enzymatic determination of purine nucleotide using carbon dots modified glassy carbon electrode

**R. Karthikeyan, D. James Nelson and S. Abraham John\***

Centre for Nanoscience and Nanotechnology  
Department of Chemistry, The Gandhigram Rural Institute  
Gandhigram-624 302, Dindigul, Tamilnadu, India  
E-mail : [abrajohn@yahoo.co.in](mailto:abrajohn@yahoo.co.in)

---

\*Corresponding author: Tel: +91 451 245 2371; Fax : + 91 451 245 3031

E-mail: [abrajohn@yahoo.co.in](mailto:abrajohn@yahoo.co.in) , [s.abrahamjohn@ruraluniv.ac.in](mailto:s.abrahamjohn@ruraluniv.ac.in)

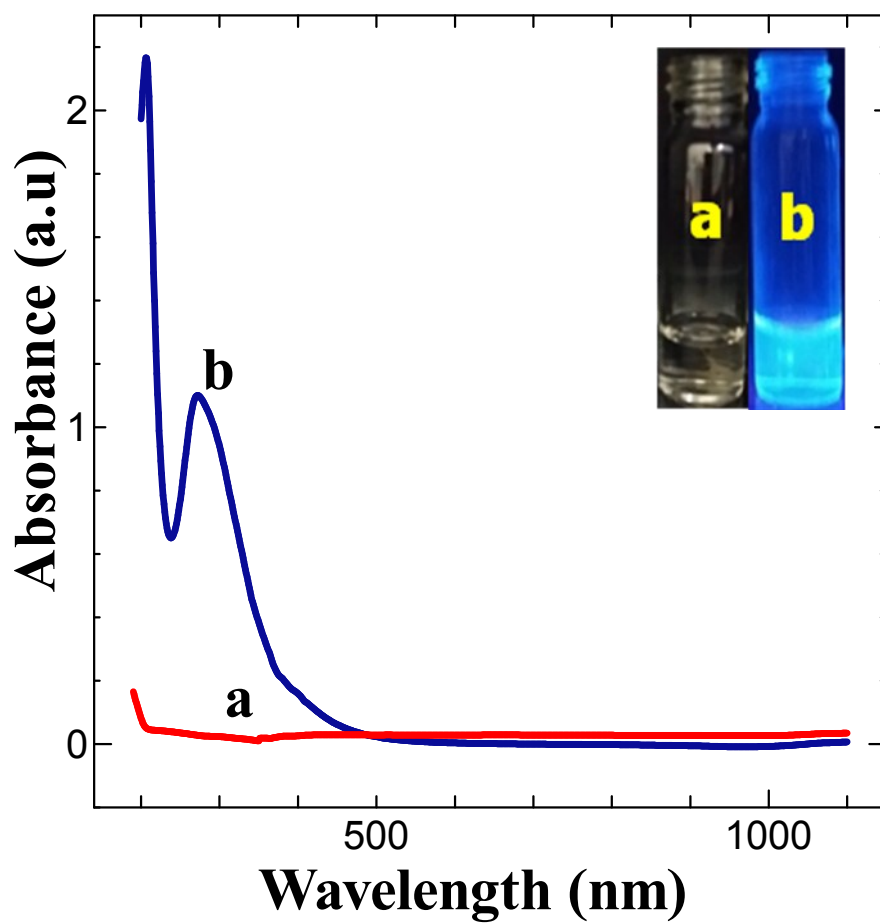

Fig. S1.(A) UV-visible spectra obtained for aqueous solution of (a) glucose and (b) CDs.

Inset: photographs obtained for CDs (a) under ambient light and (b) under UV light.

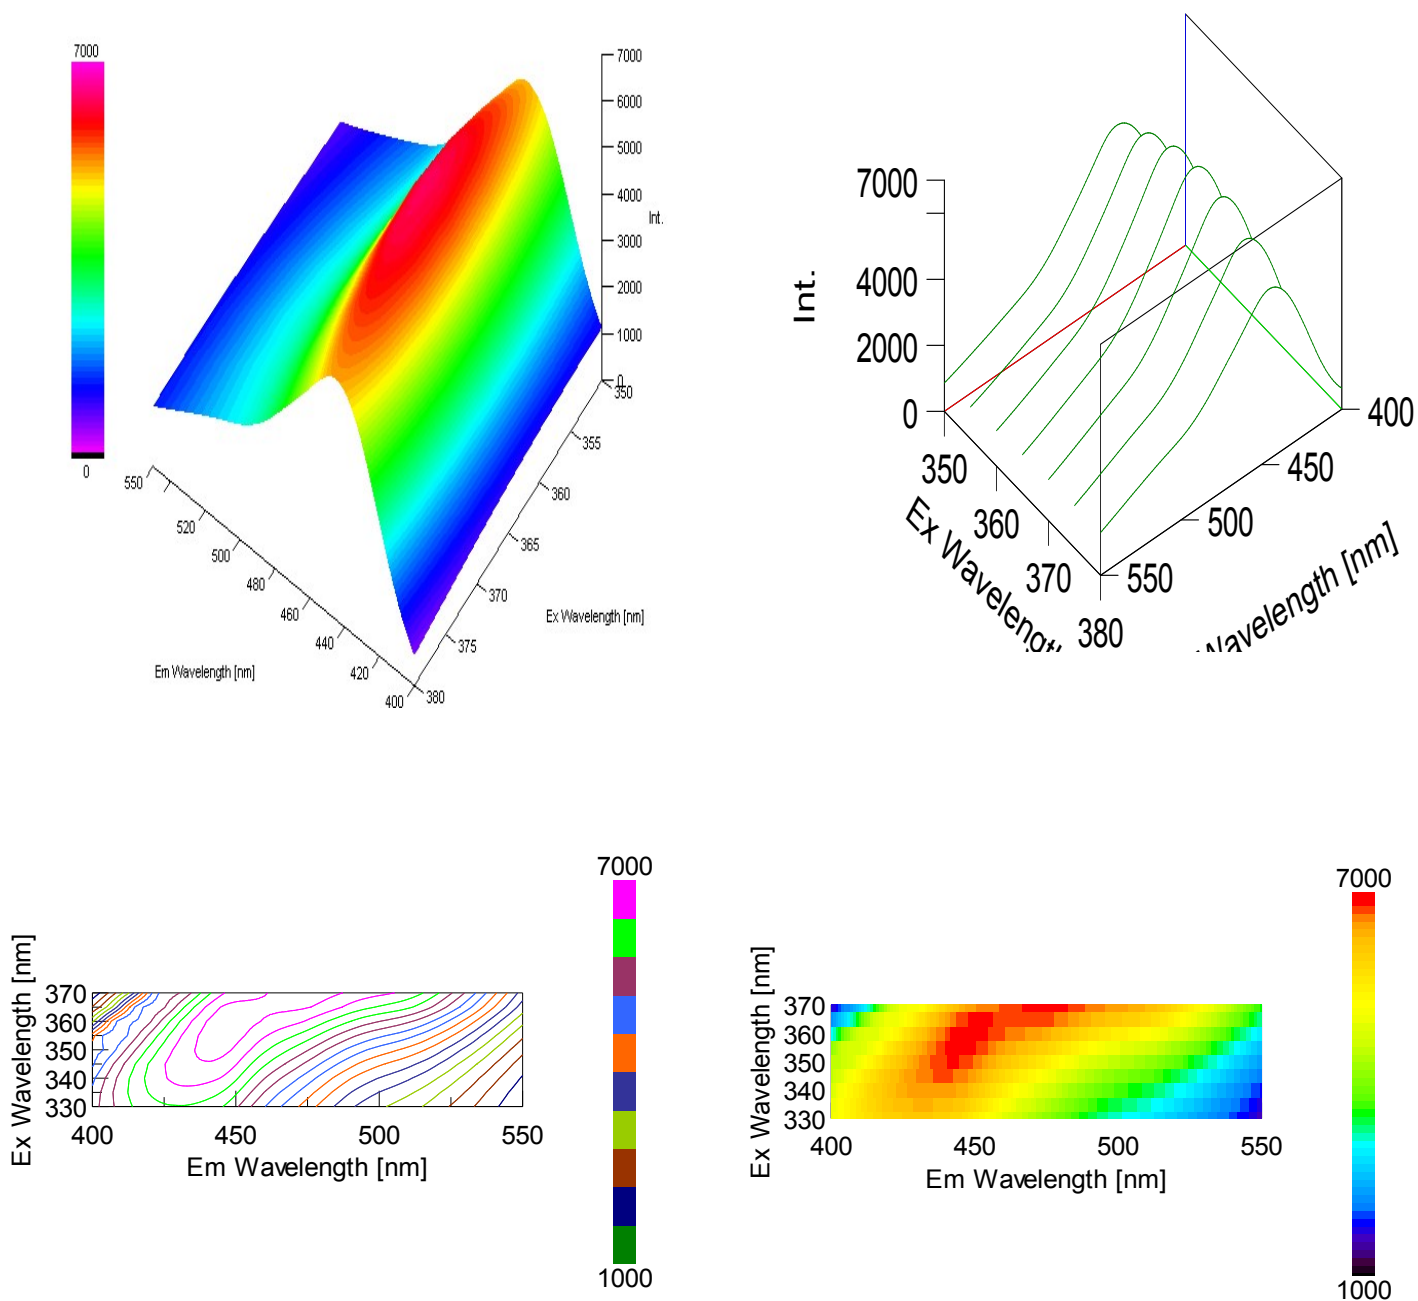

Fig. S2. 3D fluorescence spectra recorded for the colloidal solution of CDs.

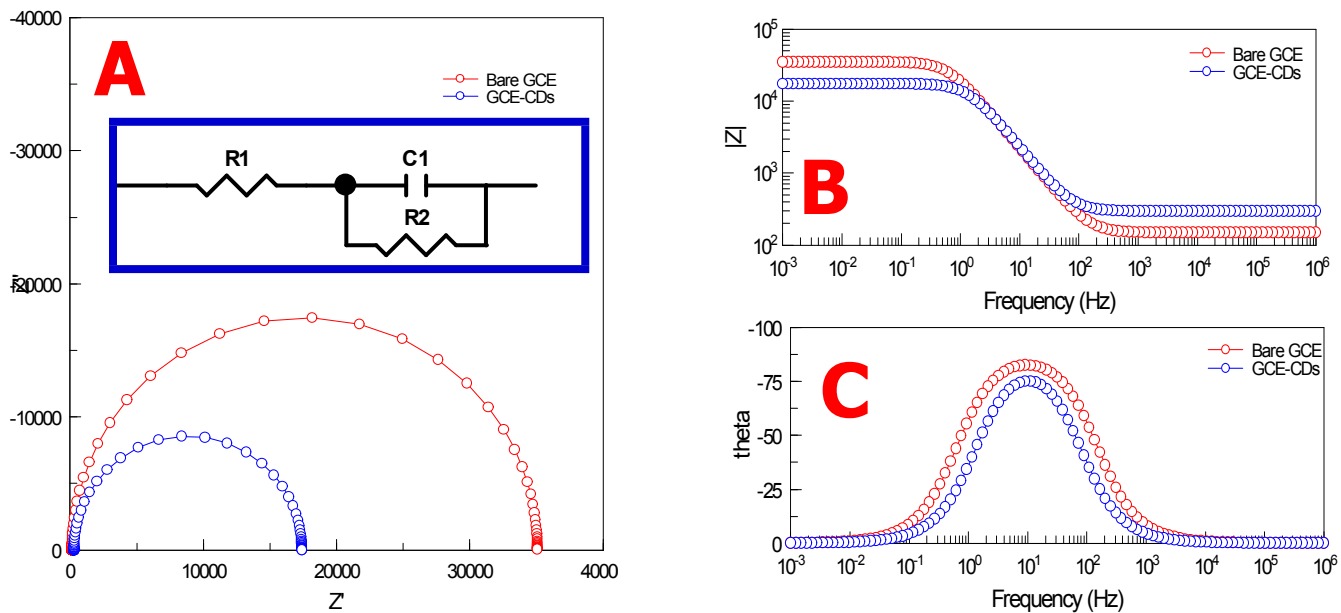

Fig.S3. (A) Nyquist , (B) Bode-amplitude and (C) Bode-phase angle plots for bare GC and CD/GC electrodes in 1 mM  $\text{Ru}(\text{NH}_3)_6\text{Cl}_3$  in 0.2 M PB solution (pH3) at scanning frequencies from 0.01 to 100 000 Hz. Inset: equivalent electrical circuit used for fitting the impedance spectra.

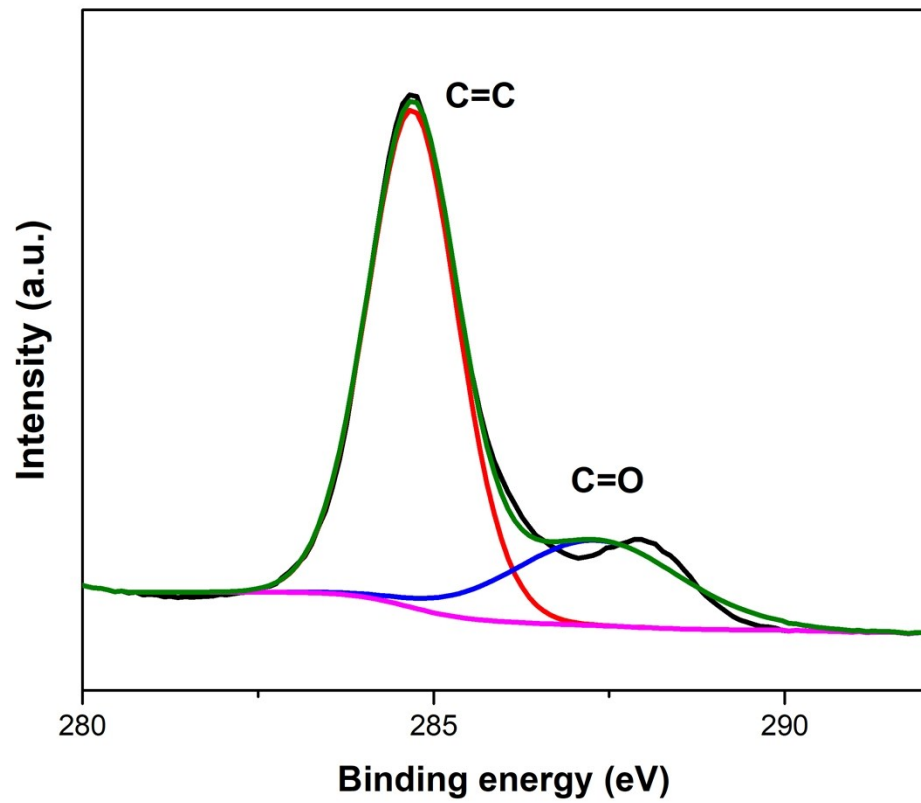

Fig.S4. XPS of bare GC plate in the C1s region.

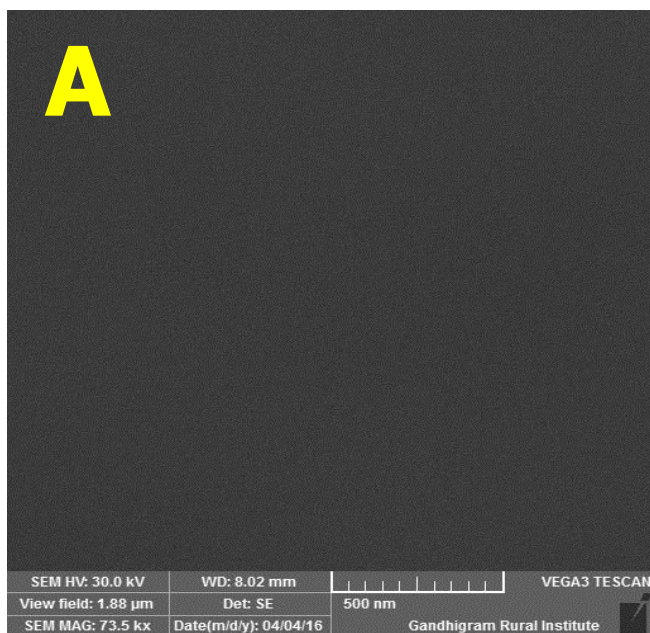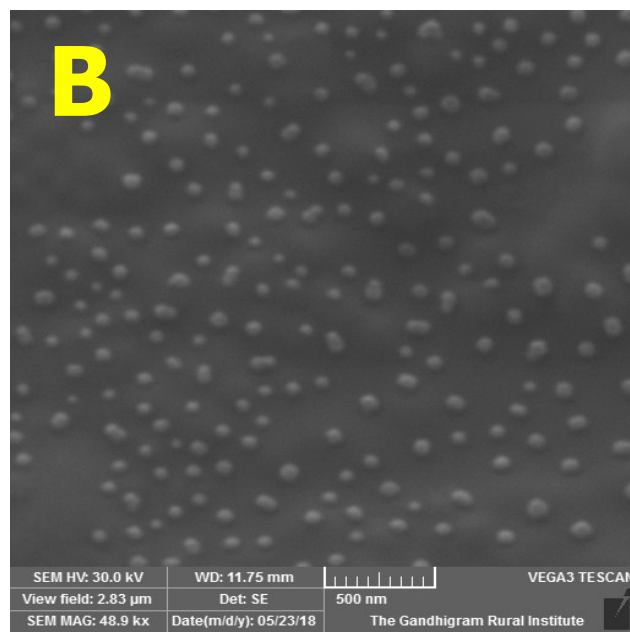

Fig.S5. SEM images obtained for (A) bare GC, (B) CD/GC plates.

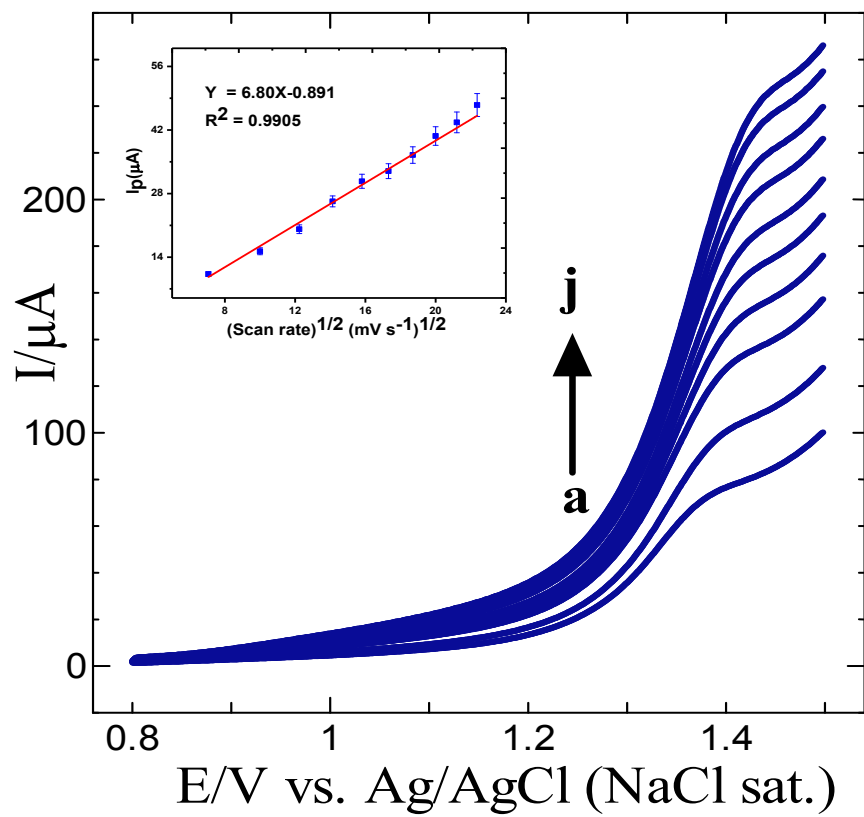

Fig. S6. LSVs obtained at CD/GC electrode for 0.5 mM INO in 0.2 M PB solution at 50 to 500  $\text{mV s}^{-1}$  (a-j). **Inset:** Calibration plot for oxidation current of INO against square root of scan rates.

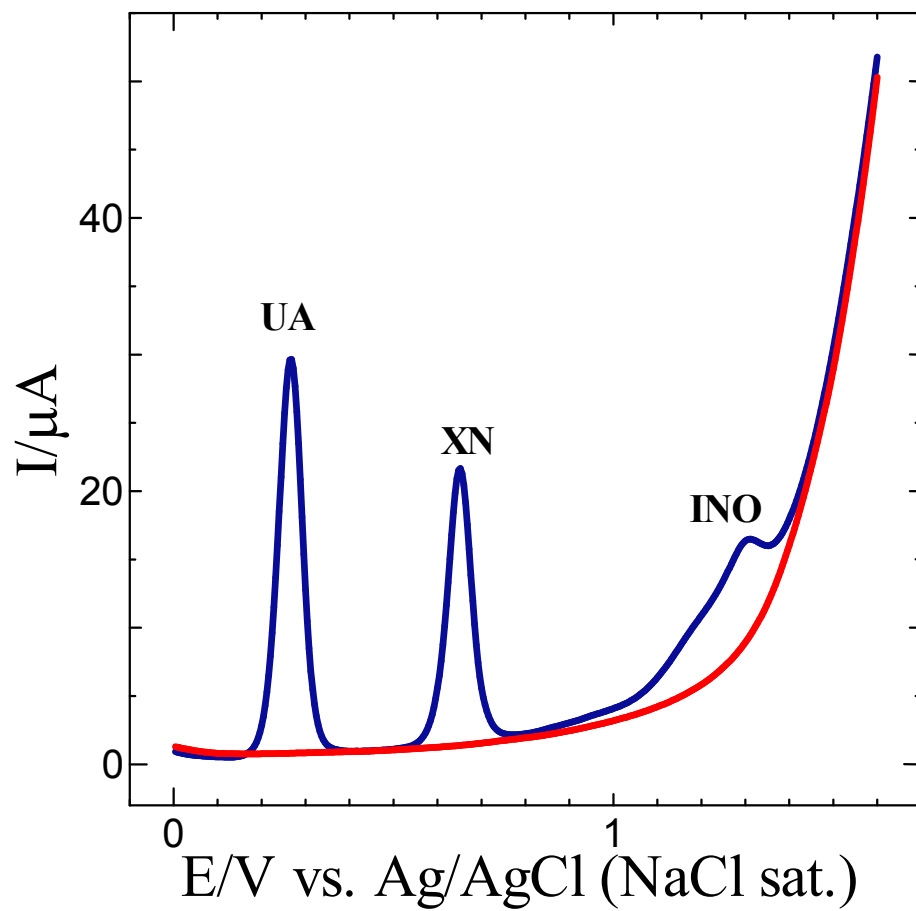

Fig. S7. DPVs obtained at CD/GC electrode for 20  $\mu\text{M}$  INO in the presence of 1 mM each UA and XN in 0.2 M PB solution (pH 7.2).



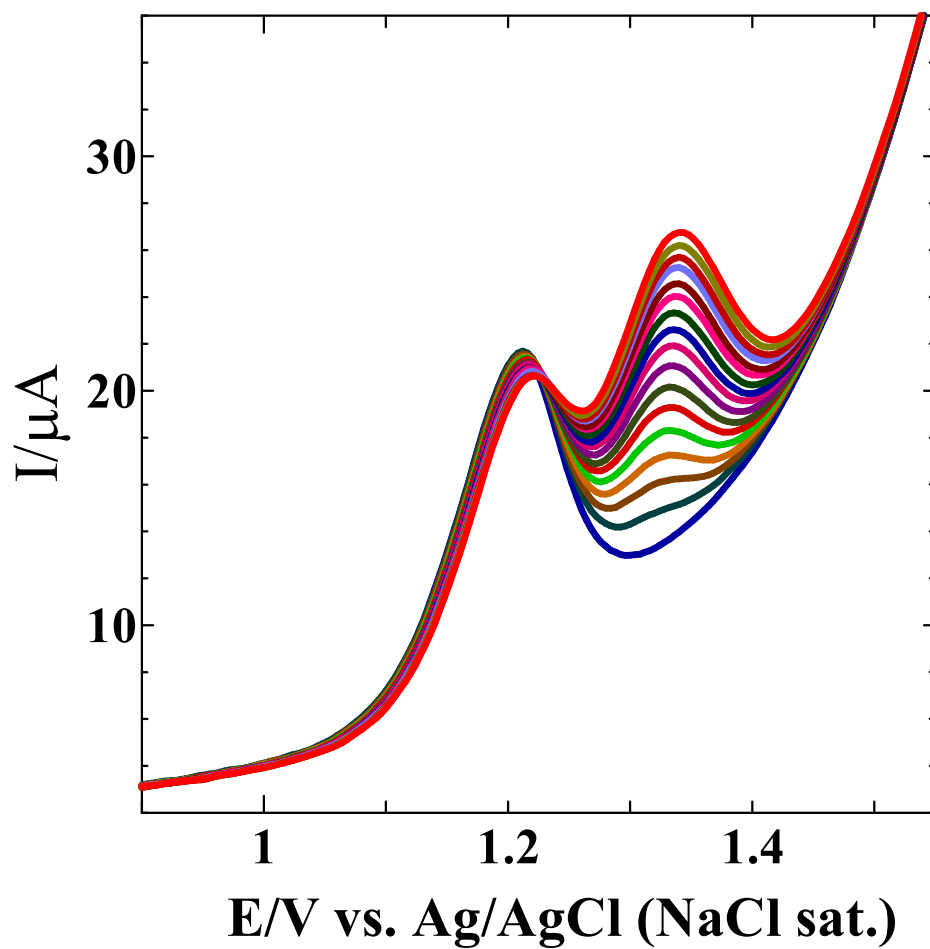

Fig. S8. DPVs obtained at CD/GC electrode for each increment of 5  $\mu\text{M}$  INO in the presence of 200  $\mu\text{M}$  of adenosine in 0.2 M PB solution (pH 7.2).

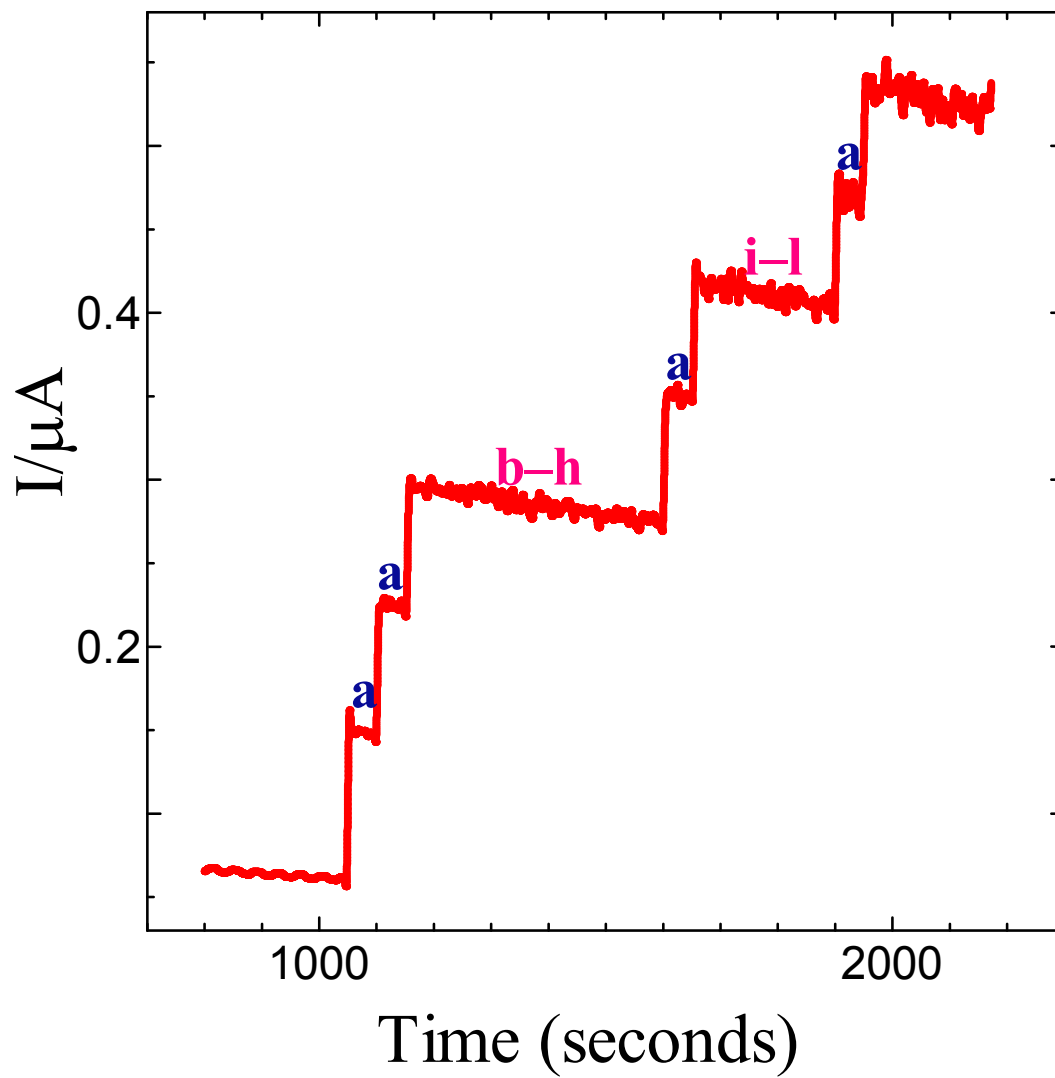

Fig. S9. Amperometric  $i$ - $t$  curves obtained for addition of (a) 100 nM of INO and each 100  $\mu\text{M}$  of (b) urea, (c)  $\text{Ca}^{2+}$ , (d)  $\text{Mg}^{2+}$ , (e) oxalate, (f)  $\text{K}^+$  (g)  $\text{Na}^+$  (h)  $\text{PO}_4^{3-}$  (i)  $\text{SO}_4^{2-}$  (j)  $\text{NH}_4^+$  (k)  $\text{NO}_3^-$  and (l) glucose at the time interval of 50 s at CD/GC electrode in 0.2 M PBS (pH 6).  $E_{\text{app}} = +1.4$  V.

Table S1 Impedance spectral data

| <b>parameters</b>                         | <b>bare GCE</b>             | <b>CDs/GCE</b>              |
|-------------------------------------------|-----------------------------|-----------------------------|
| <b>R<sub>s</sub> (kΩ)</b>                 | 0.15                        | 0.17                        |
| <b>C (μF)</b>                             | 4.31                        | 2.54                        |
| <b>R<sub>ct</sub> (kΩ)</b>                | <b>40.96</b>                | <b>21.20</b>                |
| <b>k<sub>et</sub> (cm s<sup>-1</sup>)</b> | <b>0.92×10<sup>-3</sup></b> | <b>1.79×10<sup>-3</sup></b> |

Table S2 Determination of INO in human blood serum

| <b>S.No</b> | <b>Added<br/>(<math>\mu\text{M}</math>)</b> | <b>Found<br/>(<math>\mu\text{M}</math>)</b> | <b>Recovery (%)</b> | <b>RSD (%)</b> |
|-------------|---------------------------------------------|---------------------------------------------|---------------------|----------------|
| BS1         | 20.0                                        | 19.90                                       | 99.50               | 1.5            |
|             | 40.0                                        | 39.70                                       | 99.20               |                |
|             | 60.0                                        | 59.65                                       | 99.40               |                |

Table S3 Determination of INO in human urine samples

| <b>S.No</b> | <b>Added (<math>\mu\text{M}</math>)</b> | <b>Found (<math>\mu\text{M}</math>)</b> | <b>Recovery (%)</b> | <b>RSD (%)</b> |
|-------------|-----------------------------------------|-----------------------------------------|---------------------|----------------|
| US1         | 50.0                                    | 49.85                                   | 99.70               | 1.0            |
|             | 100.0                                   | 99.60                                   | 99.60               |                |
|             | 150.0                                   | 149.70                                  | 99.60               |                |
